# Supplementary material for: Methyl Farnesoate Plays a Dual Role in Regulating Drosophila Metamorphosis
Source: PubMed Central journal article supplement (PMC4361637; doi:10.1371/journal.pgen.1005038), 2015-03-16
Supplement: pgen.1005038.s007.pdf [file pgen.1005038.s007.pdf]

**S1 Table. Primers used in this paper.**

| <b>Primers</b>             | <b>Sequences</b>                           |
|----------------------------|--------------------------------------------|
| <i>jhamt-5'end-Not I</i>   | AGAATGCGGCCGCTAGGGGCTCATTATCCCA            |
| <i>jhamt-5'end-Acc65 I</i> | CGGGGTACCGTTGGCGTGCTGATATAGAGA             |
| <i>jhamt-3'end-Asc I</i>   | GAATAGGCGCGCCGTTCCAACAATTGGTCTTAC          |
| <i>jhamt-3'end-BsiWI</i>   | GAATACGTACGGAAGCAGGACCTTCAATTGCG           |
| <i>jhamt-GAL4-SacII</i>    | CCGCGGCAACCCTTTGCTCTCAACATTTACG            |
| <i>jhamt-GAL4-BamHI</i>    | CCGCGGCAACCCTTTGCTCTCAACATTTACG            |
| <i>jhamt-1</i>             | GTGTATTTACTAGCTGTCATAGGCG                  |
| <i>jhamt-2</i>             | TTGGTTGATTTCAAGTAGTTGCAGTT                 |
| <i>jhamt-3</i>             | TCTCTTATCTATCGCTACTTGGTTG                  |
| <i>jhamt-4</i>             | CAATTATAATGCCGAAGCCTCTCTA                  |
| <i>jhamt-5</i>             | CGGTAACGTGCTCATGGACT                       |
| <i>jhamt-6</i>             | TTCGGGCTTCAGAAGATTGT                       |
| <i>jhamt-7</i>             | TGACCATGTCACCTCGTTCTACTGC                  |
| <i>jhamt-8</i>             | GAAGTCATCCAGGAAGTGTTCATGC                  |
| <i>CG10527-F</i>           | GAGGTGAAAGTCCAGGGAACAAA                    |
| <i>CG10527-R</i>           | CCAACCTCTACGAGTAGCGGGTA                    |
| <i>Kr-h1-F</i>             | GAATACGACATAACAGCC                         |
| <i>Kr-h1-R</i>             | CGATTTCCGTGAATATGTTCT                      |
| <i>USP dsRNA-F</i>         | TAATACGACTCACTATAGGGAGAGAGTCCCGTGCCCTTCAT  |
| <i>USP dsRNA-R</i>         | TAATACGACTCACTATAGGGAGACCCTGGACACGCTATTGGT |
| <i>USP-F</i>               | TTGGTCCCTATCCACAGTCC                       |
| <i>USP-R</i>               | GCGGCTTTCAGCAGAATCAC                       |
| <i>hmgcr-F</i>             | CAGCGACATCTCCGAACT                         |
| <i>hmgcr-R</i>             | ACGCACCACAGACATATCAA                       |
